# Supplementary material
Source: publisher figshare collection journal article supplement (https://tandf.figshare.com/articles/dataset/_/3473567)
Supplement: Supplementary file 2 [file 2]

Archive with 2 entries (2 files):
- ilpr_a_1196702_sm2151.pdf
- ilpr_a_1196702_sm7164.pdf
